# Supplementary material for: Systemic Response of Antioxidants, Heat Shock Proteins, and Inflammatory Biomarkers to Short‐Lasting Exercise Training in Healthy Male Subjects
Source: Hindawi journal article supplement (doi:10.1155/2021/1938492), 2021-01-01

**Supplementary Table 1.** List of primary antibodies utilized.

| Antigen                                         | Product number | Dilution | Manufacturer       |
|-------------------------------------------------|----------------|----------|--------------------|
| <b>β-actin</b>                                  | sc-47778       | 1:3000   | Santa Cruz         |
| <b>GAPDH</b>                                    | MAB 374        | 1:3000   | Millipore          |
| <b>αBcrystallin (HSPB5)</b>                     | ADI-SPA-222    | 1:2000   | Enzo Life Sciences |
| <b>phospho-αBcrystallin (S59)<br/>(p-HSPB5)</b> | ADI-SPA-227    | 1:1000   | Enzo Life Sciences |
| <b>4-hydroxynonenal</b>                         | ab46545        | 1:1000   | Abcam              |
| <b>HSP70 (HSP1A1)</b>                           | ADI-SPA-810    | 1:2000   | Enzo Life Sciences |
| <b>HSP27 (HSPB1)</b>                            | sc-1048        | 1:1000   | Santa Cruz         |
| <b>phospho-HSP27 (p-HSPB1)</b>                  | #2401          | 1:1000   | Cell Signaling     |
| <b>ZnCuSOD (SOD1)</b>                           | sc-101523      | 1:500    | Santa Cruz         |
| <b>MnSOD (SOD2)</b>                             | SOD-110        | 1:1000   | Stressgen          |
| <b>CATALASE</b>                                 | sc-271803      | 1:1000   | Santa Cruz         |
| <b>GPx1</b>                                     | bs-3882R       | 1:1000   | Bioss Antibodies   |
| <b>TrxR1</b>                                    | sc-20147       | 1: 1000  | Santa Cruz         |
| <b>p-NFκB p65</b>                               | sc-166748      | 1: 1000  | Santa Cruz         |
| <b>NFκB</b>                                     | sc-372         | 1: 1000  | Santa Cruz         |

**Supplementary Table 2.** Sequences of the oligonucleotides used for RT-qPCR.

| Target Gene    | FW sequence                    | Rev sequence                     |
|----------------|--------------------------------|----------------------------------|
| <i>SOD1</i>    | 5'- AAAGATGGTGTGGCCGATGT - 3'  | 5'- GCCAATGATGCAATGGTCTCC - 3'   |
| <i>SOD2</i>    | 5'- CCCTGGAACCTCACATCAAC - 3'  | 5'- GGTGACGTTTCAGGTTGTTCA - 3'   |
| <i>TrxR1</i>   | 5'-ACAAGCCCTGCAAGACTCTC-3'     | 5'-AGCCCCAATTCAAAGAGCCA-3'       |
| <i>GPx1</i>    | 5'-ACGATGTTGCCTGGAAC TTT-3'    | 5'-TCGATGTCAATGGTCTGGAA-3'       |
| <i>HSP70</i>   | 5'- AGGGGCCTTTCCAAGATTGC - 3'  | 5'- GCAAACACAGGAAATTGAGAACT - 3' |
| <i>HSP27</i>   | 5'- GCAGGACGAACATGGCTACAT - 3' | 5'- TGGAGGCAGCGTGTATTTC - 3'     |
| <i>GAPDH</i>   | 5'- TGGTCACCAGGGCTGCTT - 3'    | 5'- CATGTAGTTGAGGTCAATGAAGG - 3' |
| <i>Cyclo A</i> | 5'- GTCAACCCACCGTGTTCCT - 3'   | 5'- CTGCTGTCTTTGGGACCTTGT - 3'   |

Supplementary figure 1

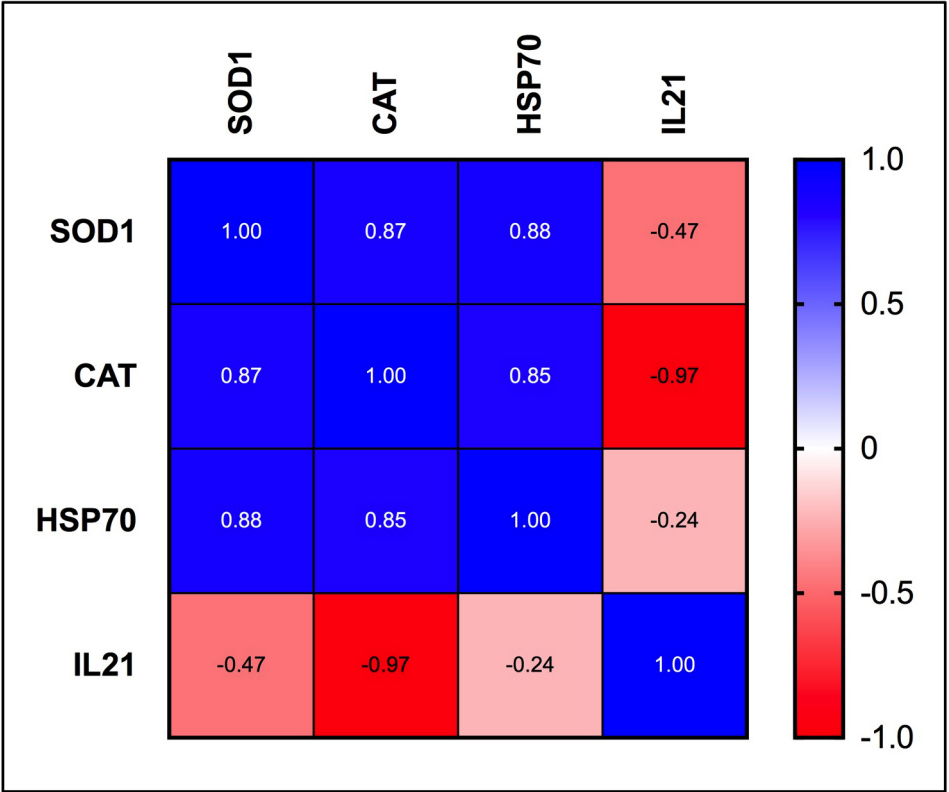

Supplement: f1 [file 1938492.f1.zip]
