# Supplementary figures and images for: Systemic Response of Antioxidants, Heat Shock Proteins, and Inflammatory Biomarkers to Short‐Lasting Exercise Training in Healthy Male Subjects
Source: Hindawi journal article supplement (doi:10.1155/2021/1938492), 2021-01-01

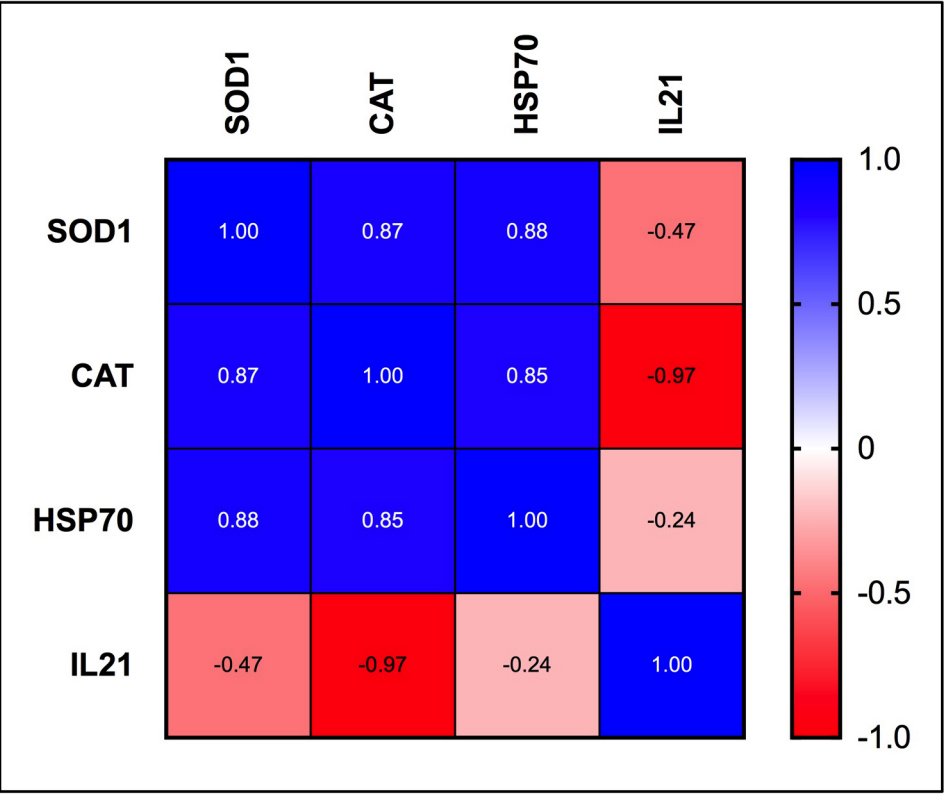

Supplement: f1 [file 1938492.f1.zip]
